# Supplementary material for: Krill Oil Improves Mild Knee Joint Pain: A Randomized Control Trial
Source: PLoS One. 2016 Oct 4;11(10):e0162769. doi: 10.1371/journal.pone.0162769 (PMC5049853; doi:10.1371/journal.pone.0162769)
Supplement: S1 Table — (XLSX) [file pone.0162769.s001.xlsx]

## Sheet: Sheet1
	CONSORT 2010 check list
	Section/Topic	Item #	Checklist item	Reported section
	Title and abstract
		1a. Title	Identification as a randomised trial in the title.	Yes
		1b. Abstract	In the abstract, description of the experimental treatment, comparator, care providers, centres, and blinding status.	Abstract
	Introduction
		2a. Background	Scientific background and explanation of rationale	Introduction
		2b. Objectives	Specific objectives or hypotheses	Introduction
	Methods
		3a. Trial Design	Description of trial design (such as parallel, factorial) including allocation ratio	Methods > Study design
		3b. Changes to trial design	Important changes to methods after trial commencement (such as eligibility criteria), with reasons	Methods > Study design
		4a. Participants	Eligibility criteria for participants, when applicable, eligibility criteria for centres and those performing the interventions.	Methods > Participants
		4b. Study settings	Settings and locations where the data were collected	Methods > Participants
		5a. Interventions	Precise details of both the experimental treatment and comparator.	Methods > Study design & Test supplement
		6a. Outcomes	Completely defined pre-specified primary and secondary outcome measures, including how and when they were assessed	Methods > Study design
		6b. Changes to outcomes	Any changes to trial outcomes after the trial commenced, with reasons	Methods > Study design
		7a. Sample size	How sample size was determined.	Methods > Study design
		7b. Interim analyses and stopping guidelines	When applicable, explanation of any interim analyses and stopping guidelines	N/A
		8a. Randomisation: sequence generation	Method used to generate the random allocation sequence. When applicable, how care providers were allocated to each trial group.	Methods > Study design
		8b. Randomisation: type	Type of randomisation; details of any restriction (such as blocking and block size)	Methods > Study design
		9. Randomisation: allocation concealment mechanism	Mechanism used to implement the random allocation sequence (such as sequentially numbered containers), describing any steps taken to conceal the sequence until interventions were assigned	Methods > Study design
		10. Randomisation: implementation	Who generated the allocation sequence, who enrolled participants, and who assigned participants to interventions	Methods > Study design
		11a. Blinding	If done, who was blinded after assignment to interventions (for example, participants, care providers, those assessing outcomes) and how. Whether or not those administering co-interventions were blinded to group assignment.	Methods > Study design & test supplement
		11b. Similarity of interventions	If blinded, method of blinding and description of the similarity of interventions.	Methods > Study design & Test supplement
		12a. Statistical methods	Statistical methods used to compare groups for primary and secondary outcomes. When applicable, details of whether and how the clustering by care providers or centres was addressed.	Methods > Statistical analyses
		12b. Additional analyses	Methods for additional analyses, such as subgroup analyses and adjusted analyses	N/A
	Results
		13a. Participant Flow	For each group, the number s of participants who were randomly assigned, received intended treatment, and were analysed for the primary outcome.	Methods > Study design, Statistical analyses, & Fig. 1
		13b. Implementation of interventions (new item for nonpharmacological trials)	Details of the experimental treatment and comparator as they were implemented.	Methods > Study design, Statistical analyses, & Fig. 1
		13c. Losses and exclusions	For each group, losses and exclusions after randomisation, together with reasons	Methods > Study design, Statistical analyses, & Fig. 1
		14a. Recruitment	Dates defining the periods of recruitment and follow-up	Methods > Study design
		14b. Reason for stopped trial	Why the trial ended or was stopped	N/A
		15. Baseline data	A table showing baseline demographic and clinical characteristics for each group. When applicable, a description of care providers (case volume, qualification, expertise, etc.) and centres (volume) in each group.	Table 1
		16. Numbers analysed	For each group, number of participants (denominator) included in each analysis and whether the analysis was by original assigned groups	Methods > Study design, Statistical analyses, & Fig. 1
		17a. Outcomes and estimation	For each primary and secondary outcome, results for each group, and the estimated effect size and its precision (such as 95% confidence interval)	Results, Tables 2, 3, 4, 5, 6 & 7
		17b. Binary outcomes	For binary outcomes, presentation of both absolute and relative effect sizes is recommended	N/A
		18. Ancillary analyses	Results of any other analyses performed, including subgroup analyses and adjusted analyses, distinguishing pre-specified from exploratory	N/A
		19. Harms	All important harms or unintended effects in each group	Methods > Study design
	Discussion
		20. Limitations	Trial limitations, addressing sources of potential bias, imprecision, and, if relevant, multiplicity of analyses	Discussion
		21. Generalisability	Generalisability (external validity, applicability) of the trial findings according to the intervention, comparators, patients, care providers, and centres involved in the trial.	Discussion
		22. Interpretation	Interpretation consistent with results, balancing benefits and harms, and considering other relevant evidence	Discussion
	Other information
		23. Registration	Registration number and name of trial registry	Abstract & Methods > Participants
		24. Protocol	Where the full trial protocol can be accessed, if available	S3
		25. Funding	Sources of funding and other support (such as supply of drugs), role of funders	Acknowledgement
