# Supplementary material for: Krill Oil Improves Mild Knee Joint Pain: A Randomized Control Trial
Source: PLoS One. 2016 Oct 4;11(10):e0162769. doi: 10.1371/journal.pone.0162769 (PMC5049853; doi:10.1371/journal.pone.0162769)
Supplement: S2 Table — (XLSX) [file pone.0162769.s002.xlsx]

## Sheet: Participants
No	Supplement	Supplement1	Age	Sex_F=0、M=１	Height (cm)	Weight (kg)	BMI	Compliance	Smoking _0=NO、1=YES	Drinking_0=NO_1=YES	Anti-inflammatory analgesic_o=No_1=Yes	EPA_0=No_1=Yes	Lipid-lowering drug_0=No_1=Yes
1	A	Placebo	65	0	158.5	65	25.9	0.983333	0	0	0	0	0
2	B	Kril_Oil	55	0	154.5	51.5	21.6	1	1	0	0	0	0
3	B	Kril_Oil	66	0	155	50	20.8	0.966667	0	0	0	0	0
4	B	Kril_Oil	61	1	170	65	22.5	0.966667	0	0	0	0	0
5	A	Placebo	60	0	155	44.5	18.5	1	0	0	0	0	1
6	A	Placebo	79	0	156	60	24.7	1	0	0	0	0	0
7	B	Kril_Oil	71	0	146	43	20.2	1	0	0	0	0	0
8	A	Placebo	71	0	156	53	21.8	1	0	0	0	0	1
9	B	Kril_Oil	80	0	151	52	22.8	1	0	0	0	0	1
10	B	Kril_Oil	67	0	150	50	22.2	1	0	0	0	0	0
11	A	Placebo	60	0	159	79	31.2	0.833333	0	1	0	0	1
12	A	Placebo	58	0	147	75	34.7	1	0	0	0	0	1
13	B	Kril_Oil	48	0	163	92	34.6	0.95	0	1	1	0	0
14	A	Placebo	54	0	158	65	26	1	0	1	0	0	0
15	B	Kril_Oil	67	0	158	65	26	1	1	0	0	1	0
16	A	Placebo	62	0	155	46.5	19.4	1	0	0	0	0	0
17	B	Kril_Oil	54	0	150	63	28	1	0	0	0	0	0
18	B	Kril_Oil	68	0	143	41	20	1	1	1	0	0	0
19	A	Placebo	51	0	172	53	17.9	1	0	0	0	0	0
20	B	Kril_Oil	85	1	170	56.5	19.6	1	0	1	0	0	0
21	B	Kril_Oil	53	0	157	49	19.9	0.983333	1	0	0	0	0
22	A	Placebo	72	0	148	60	27.4	1	0	0	1	0	0
23	B	Kril_Oil	79	0	150	45	20	0.95	0	0	0	0	0
24	B	Kril_Oil	70	0	145	53	25.2	1	0	0	0	0	0
25	B	Kril_Oil	74	0	157	55	22.3	1	0	0	1	0	0
26	A	Placebo	68	0	160	60	23.4	0.966667	0	0	0	0	0
27	A	Placebo	78	0	150	56	24.9	1	0	0	0	0	0
28	A	Placebo	72	0	153	63	26.9	1	0	0	0	0	0
29	B	Kril_Oil	58	1	165	65	23.9	1	1	1	0	0	0
30	A	Placebo	60	1	172	71	24	0.966667	0	0	0	0	0
31	B	Kril_Oil	65	0	158	64	25.6	1	0	1	0	0	0
32	B	Kril_Oil	49	0	153	58	24.8	1	1	1	0	0	0
33	A	Placebo	42	0	150	44	19.6	1	1	0	0	0	0
34	B	Kril_Oil	80	0	146	74	34.7	1	0	0	1	0	0
35	A	Placebo	38	0	168	51	18.1	0.916667	1	0	0	0	0
36	B	Kril_Oil	55	0	156	60	24.7	0.866667	0	1	0	0	0
37	A	Placebo	71	0	155	52	21.6	1	0	1	0	0	0
38	A	Placebo	72	0	147	42	19.4	1	0	1	0	0	0
39	A	Placebo	57	0	157	61	24.7	1	0	0	0	0	0
40	A	Placebo	65	0	150	63	28	1	0	0	0	0	1
41	B	Kril_Oil	68	0	150	50	22.2	1	0	0	0	0	0
42	A	Placebo	68	0	153	57	24.3	1	0	0	0	0	0
43	B	Kril_Oil	68	0	159	70	27.7	1	0	0	0	0	0
44	B	Kril_Oil	71	0	157	54	21.9	0.983333	0	0	0	0	0
45	B	Kril_Oil	75	0	148.9	53	23.9	1	0	0	0	0	0
46	A	Placebo	77	1	163	63	23.7	1	0	0	0	0	0
47	B	Kril_Oil	58	1	172	65	22	0.9	0	1	0	0	0

## Sheet: JKOM
No	Answer	Answer_01	VAS	II-1	II-2	II-3	II-4	II-5	II-6	II-7	II-8	III-9	III-10	III-11	III-12	III-13	III-14	III-15	III-16	III-17	III-18	IV-19	IV-20	IV-21	IV-22	IV-23	V-24	V-25	Total score
1	Before	0	5	2	2	1	2	2	2	2	2	1	2	1	1	1	1	1	1	1	1	2	1	1	1	1	2	2	36
2	Before	0	2.6	2	2	1	2	2	2	2	3	2	3	1	1	1	1	1	1	1	1	5	1	1	1	1	2	1	41
3	Before	0	6.4	3	4	4	4	4	4	4	3	4	4	3	2	2	2	1	1	1	2	2	2	2	2	2	4	4	70
4	Before	0	4.5	3	3	3	3	3	3	3	3	2	2	2	1	1	2	1	1	1	1	2	1	1	1	1	2	2	48
5	Before	0	4.7	3	3	2	1	3	3	3	1	3	3	1	2	2	1	1	1	1	1	4	3	1	1	1	2	2	49
6	Before	0	2.6
7	Before	0	0.2	1	1	1	1	1	1	1	2	1	2	1	1	1	1	1	1	1	1	1	1	2	1	1	2	2	30
8	Before	0	1.1	2	1	1	2	2	2	2	1	1	1	1	1	1	1	1	1	1	2	2	1	1	1	1	3	1	34
9	Before	0	2.3	3	2	1	1	2	2	1	2	2	1	1	1	1	1	1	1	1	1	2	1	1	1	1	1	1	33
10	Before	0	6.6	2	2	2	2	2	2	2	2	2	2	2	2	2	1	1	1	1	1	1	1	1	1	1	2	2	40
11	Before	0	7.4	1	1	1	1	2	2	2	2	2	2	1	1	1	1	1	1	1	1	1	1	1	1	1	2	2	33
12	Before	0	2.5	2	2	2	2	1	2	1	2	1	2	1	1	1	1	1	1	1	1	4	1	1	1	1	4	1	38
13	Before	0	3.7	1	1	1	2	2	1	2	1	1	1	1	1	1	1	1	1	1	1	5	1	1	1	1	2	1	33
14	Before	0	2.5	2	2	2	2	2	2	2	2	2	2	1	1	2	1	1	1	1	1	5	1	1	1	1	2	2	42
15	Before	0	1	3	2	1	2	2	2	2	2	1	2	1	1	1	1	1	1	1	1	3	1	1	2	1	3	1	39
16	Before	0	2.9	1	2	1	2	1	1	2	2	1	1	1	1	2	2	1	1	1	1	2	2	1	1	2	2	2	36
17	Before	0	0	1	1	1	1	1	1	1	1	1	1	1	1	1	1	1	1	1	1	1	1	1	1	1	1	1	25
18	Before	0
19	Before	0	3.9
20	Before	0	5.4	4	3	4	3	4	4	3	3	4	4	2	3	2	2	1	2	1	2	2	2	1	1	1	2	2	62
21	Before	0	8.1	3	3	4	2	3	3	3	3	3	3	3	3	3	1	1	2	2	2	4	2	1	1	1	2	2	60
22	Before	0	3.5	3	3	4	3	3	4	3	2	3	3	2	3	4	2	5	2	3	3	3	1	1	1	1	3	3	68
23	Before	0	3.5	3	3	2	2	3	3	3	2	2	2	1	1	1	3	1	2	2	2	3	1	1	1	1	2	2	49
24	Before	0	2.6	3	3	2	2	2	2	3	3	2	3	2	2	2	3	2	2	2	2	2	2	1	1	1	3	2	54
25	Before	0	6.8	3	2	2	3	3	4	4	2	4	4	3	1	2	1	1	1	1	1	1	1	2	1	2	4	3	56
26	Before	0	3.2
27	Before	0	4.5	2	2	1	2	2	4	2	2	3	3	1	1	1	1	1	1	1	2	2	1	1	1	1	2	2	42
28	Before	0	4.7	3	2	1	2	2	3	2	2	2	3	2	2	3	3	1	2	2	4	2	4	4	2	3	3	3	62
29	Before	0	6.2	3	3	2	2	3	2	3	2	2	2	1	1	2	1	1	1	1	1	1	1	1	1	1	2	3	43
30	Before	0	2.2	2	3	1	1	2	2	2	1	2	2	1	2	2	1	1	1	2	2	3	2	1	1	1	1	2	41
31	Before	0	3.8	2	2	1	2	2	1	2	2	1	1	1	1	2	1	1	1	1	1	2	1	1	1	1	2	1	34
32	Before	0	0.3	2	1	1	1	2	2	2	1	1	1	1	1	1	2	1	1	1	1	5	1	1	1	1	2	1	35
33	Before	0	0.9	1	2	1	1	2	2	2	2	2	2	1	1	1	2	1	1	1	1	4	1	1	1	1	2	1	37
34	Before	0	4.9	2	2	2	2	2	2	2	2	3	3	2	2	2	1	1	2	2	2	2	3	2	1	3	2	2	51
35	Before	0	6.1	3	2	2	2	3	2	3	2	2	3	1	1	1	2	1	1	1	1	2	2	1	3	1	3	2	47
36	Before	0	3.3	3	2	2	2	1	2	3	2	2	2	1	2	3	1	1	1	1	2	2	2	1	1	1	2	3	45
37	Before	0	2.5	2	2	1	1	1	2	2	2	1	2	1	1	1	1	1	1	1	2	3	1	1	1	2	3	1	37
38	Before	0	0.2	2	1	1	2	2	2	2	1	2	2	1	2	2	2	1	2	1	3	2	2	5	5	5	3	4	57
39	Before	0	5.4	3	2	5	1	2	3	5	2	2	4	3	2	3	1	1	1	2	1	2	1	1	1	1	3	2	54
40	Before	0	0.5	1	2	1	2	2	2	3	2	2	3	1	1	1	2	1	1	1	2	1	2	2	2	3	2	3	45
41	Before	0	0.8	2	2	1	2	2	2	3	2	1	1	1	1	1	1	1	1	1	1	5	1	1	1	1	2	1	38
42	Before	0	6.2	4	4	4	3	3	4	4	3	3	4	2	3	3	2	1	1	2	2	5	3	1	1	2	4	4	72
43	Before	0	3.8	1	2	1	1	3	4	3	4	4	4	1	1	1	1	1	1	1	1	1	2	1	1	1	1	1	43
44	Before	0	1.3	2	2	2	2	2	3	3	2	2	2	1	2	2	1	1	1	2	2	4	1	2	1	1	2	2	47
45	Before	0	1.1	2	2	2	2	2	2	2	2	2	2	2	1	1	1	1	1	1	1	1	1	1	1	1	2	1	37
46	Before	0	4	3	3	1	3	1	1	2	2	1	2	1	1	1	1	1	1	1	1	1	2	1	1	1	2	2	37
47	Before	0	2.5	2	1	2	1	1	1	2	2	1	1	1	1	2	1	1	1	1	1	2	1	1	1	1	3	2	34
1	After	1	1.7	1	2	1	1	1	1	2	2	1	2	1	1	1	1	1	1	1	1	2	1	1	1	1	1	1	30
2	After	1	3.6	2	1	1	2	2	2	2	2	2	2	1	1	1	1	1	1	1	1	1	1	1	1	1	2	1	34
3	After	1	2	3	2	3	2	2	3	3	2	2	3	2	1	1	1	1	1	1	1	2	2	1	1	1	4	1	46
4	After	1	2.4	1	2	1	2	2	2	2	2	1	1	1	1	1	1	1	1	1	1	3	1	1	1	1	2	1	34
5	After	1	1.1	2	2	1	1	1	2	2	1	1	1	1	2	2	1	1	1	1	1	4	2	1	1	1	1	1	35
6	After	1	1.5	2	2	1	1	2	2	2	2	2	2	2	2	2	1	1	2	1	2	1	1	1	1	1	2	1	39
7	After	1	0.1	1	1	1	1	1	1	2	2	1	2	1	1	1	1	1	1	1	1	1	1	1	1	1	2	1	29
8	After	1	0.5
9	After	1	1.6	1	2	1	1	1	2	1	1	1	1	1	1	1	1	1	1	1	1	3	1	1	1	1	2	1	30
10	After	1	0.7	1	1	1	1	1	1	2	2	2	2	1	1	1	1	1	1	1	1	1	1	1	1	1	2	1	30
11	After	1	0.4	1	1	1	1	2	2	1	2	1	2	1	1	1	1	1	1	1	1	1	1	1	1	1	2	1	30
12	After	1	0.5	2	2	1	1	1	2	2	1	1	1	1	1	1	1	1	1	1	1	5	1	1	1	1	2	1	34
13	After	1	0.2	1	1	1	1	1	1	1	1	1	1	1	1	1	1	1	1	1	1	5	1	1	1	1	1	1	29
14	After	1	0.2	2	1	1	1	1	1	1	1	1	1	1	1	1	1	1	1	1	1	1	1	1	1	1	2	1	27
15	After	1	0.5	1	1	1	1	2	2	2	1	1	2	1	1	1	1	1	1	1	1	2	1	1	1	1	2	1	31
16	After	1	2.9	1	1	1	2	2	1	2	2	1	1	1	1	2	2	1	1	1	1	2	1	2	1	1	1	1	33
17	After	1	0	1	1	1	1	1	1	1	1	1	1	1	1	1	1	1	1	1	1	1	1	1	1	1	1	1	25
18	After	1		1	1	1	1	1	1	1	1	1	1	1	1	1	1	1	1	1	1	1	1	1	1	1	2	1	26
19	After	1	5.3	3	2	1	3	3	3	2	2	2	2	2	2	2	2	1	1	1	1	1	1	1	1	1	2	1	43
20	After	1	8.7	3	2	2	2	3	3	2	1	3	3	2	2	2	2	1	1	1	2	5	2	1	1	1	2	1	50
21	After	1	0	1	1	1	1	1	1	1	1	1	1	1	1	1	1	1	1	1	1	2	1	1	1	1	2	1	27
22	After	1	8.5	4	4	4	4	4	4	4	3	3	4	4	4	4	3	4	4	3	4	3	3	3	3	4	2	4	90
23	After	1
24	After	1	2.7	2	2	2	2	2	2	2	2	2	2	1		1	3	3	2	1	2	1	2	1	1	1	3	1	43
25	After	1	5.2	3	2	2	2	3	4	4	3	2	4	3	3	3	1	1	1	2	1	2	1	1	1	1	3	1	54
26	After	1	2.9	1	2	1	2	2	2	2	2	1	2	1	1	1	1	1	1	1	1	1	1	1	1	1	3	1	34
27	After	1	6.4	2	2	2	2	2	4	2	4	4	4	4	2	2	1	1	3	4	4	4	4	1	2	1	4	3	68
28	After	1	0.3	1	1	1	1	2	2	1	1	2	1	1	1	2	1	1	1	1	1	2	1	1	1	1	2	1	31
29	After	1	2.5	1	2	1	2	2	2	2	2	1	1	1	1	1	1	1	1	1	1	1	1	1	1	1	1	1	31
30	After	1	2	2	1	1	1	2	1	2	1	2	2	1	1	1	1	1	1	1	2	2	1	1	1	1	2	1	33
31	After	1	0.9	1	1	1	2	1	2	1	2	1	1	1	1	1	1	1	1	1	1	3	1	1	1	1	2	1	31
32	After	1	0.4	1	1	1	1	2	2	2	1	1	1	1	1	1	1	1	1	1	1	5	1	1	1	1	2	1	33
33	After	1	0	1	1	1	1	1	1	1	1	1	1	1	1	1	1	1	1	1	1	5	1	1	1	1	1	1	29
34	After	1	2.9
35	After	1	0.6	1	1	1	1	1	1	1	1	1	1	1	1	1	1	1	1	1	1	2	1	1	1	1	1	1	26
36	After	1	0.4	2	1	1	1	1	1	2	1	1	2	1	2	2	1	1	1	1	1	5	1	1	1	1	2	1	35
37	After	1	0.3	1	1	1	1	1	1	1	1	1	1	1	1	1	1	1	1	1	1	3	1	1	1	1	3	1	29
38	After	1	1.6	1	1	1	1	2	2	1	1	2	1	1	1	1	1	1	1	1	2	1	1	1	1	2	3	1	32
39	After	1	2	2	2	2	1	1	2	2	1	1	2	1	1	1	1	1	1	1	1	1	1	1	1	1	2	1	32
40	After	1	1	1	2	1	2	2	2	2	2	2	2	1	1	2	2	1	1	1	2	1	2	2	1	2	2	1	40
41	After	1	0.9
42	After	1	2.9	2	3	2	2	2	2	3	3	2	3	1	2	2	2	1	1	1	2	5	1	1	1	1	3	1	49
43	After	1	1.2	1	2	1	1	2	2	2	1	2	2	1	1	1	1	1	1	1	1	2	1	1	1	1	2	1	33
44	After	1	1.8	1	1	1	1	1	1	2	1	1	1	1	1	1	1	1	1	1	1	3	1	1	1	1	1	1	28
45	After	1	0.4	1	1	1	1	1	2	1	1	1	1	1	1	1	1	1	1	1	1	1	1	1	1	1	1	1	26
46	After	1	4.4	2	2	2	1	1	1	2	1	1	1	1	1	1	1	1	1	1	1	5	1	1	1	1	2	1	34
47	After	1	0.3	1	1	1	1	1	1	2	2	1	1	1	1	1	1	1	1	1	1	4	1	1	1	1	3	1	32

## Sheet: JOA
No	Answer	Ⅰ-Pain on walking_ Right	Ⅰ-Pain on walking_ Left	Ⅱ-Pain on ascending or descending stairs_Right	Ⅱ-Pain on ascending or descending stairs_Left	Ⅲ-Range of motion_Right	Ⅲ-Range of motion_Left	Ⅳ-Joint effusion_Right	Ⅳ-Joint effusion_Left	Total score_Right	Total score_Left
1	Before	30	30	25	25	30	30	10	10	95	95
2	Before	30	30	25	25	35	35	10	10	100	100
3	Before	25	25	20	15	25	25	10	10	80	75
4	Before	30	30	20	20	35	35	10	10	95	95
5	Before	30	30	20	25	35	35	10	10	95	100
6	Before	30	30	20	20	30	30	10	10	90	90
7	Before	30	30	25	25	35	30	10	10	100	95
8	Before	30	30	25	25	35	35	10	10	100	100
9	Before	25	30	20	20	35	35	10	10	90	95
10	Before	30	30	25	25	35	35	10	10	100	100
11	Before	30	30	25	25	35	35	10	10	100	100
12	Before	30	30	25	25	30	30	10	10	95	95
13	Before	30	30	20	20	35	35	10	10	95	95
14	Before	30	30	25	25	35	35	10	10	100	100
15	Before	30	30	20	20	30	30	10	10	90	90
16	Before	30	30	25	25	35	35	10	10	100	100
17	Before	30	30	25	25	35	35	10	10	100	100
18	Before	30	30	20	20	35	35	10	10	95	95
19	Before	30	30	20	20	30	35	10	10	90	95
20	Before	25	25	15	15	30	30	10	10	80	80
21	Before	30	30	25	20	35	30	10	5	100	85
22	Before	25	25	20	20	25	25	10	10	80	80
23	Before	25	25	15	15	25	25	10	10	75	75
24	Before	25	25	15	15	25	25	10	10	75	75
25	Before	30	30	20	20	30	30	10	10	90	90
26	Before	30	30	25	25	35	35	10	10	100	100
27	Before	25	25	15	15	25	25	10	10	75	75
28	Before	25	25	20	20	30	30	10	10	85	85
29	Before	30	30	20	20	30	30	10	10	90	90
30	Before	30	30	25	25	30	30	10	10	95	95
31	Before	30	30	25	25	35	35	10	10	100	100
32	Before	30	30	25	25	30	30	10	10	95	95
33	Before	30	30	25	25	35	35	10	10	100	100
34	Before	25	25	20	20	30	30	10	10	85	85
35	Before	30	30	20	20	30	30	10	10	90	90
36	Before	30	30	20	25	25	25	10	10	85	90
37	Before	30	30	20	20	35	35	10	10	95	95
38	Before	20	20	20	20	30	30	10	10	80	80
39	Before	30	30	20	20	30	30	10	10	90	90
40	Before	25	25	25	25	30	30	10	10	90	90
41	Before	30	30	20	20	30	30	10	10	90	90
42	Before	25	25	20	25	25	30	10	10	80	90
43	Before	30	30	20	20	35	35	10	10	95	95
44	Before	30	30	20	20	30	30	10	10	90	90
45	Before	30	30	20	20	35	35	10	10	95	95
46	Before	30	30	20	20	30	30	10	10	90	90
47	Before	30	30	25	25	30	30	10	10	95	95
1	After	30	30	25	25	35	35	10	10	100	100
2	After	30	30	25	25	35	35	10	10	100	100
3	After	30	30	20	20	30	30	10	10	90	90
4	After	30	30	25	25	35	35	10	10	100	100
5	After	30	30	25	25	35	35	10	10	100	100
6	After	30	30	20	20	30	30	10	10	90	90
7	After	30	30	25	25	35	35	10	10	100	100
8	After	30	30	25	25	35	35	10	10	100	100
9	After	30	30	25	25	35	35	10	10	100	100
10	After	30	30	25	25	35	35	10	10	100	100
11	After	30	30	25	25	35	35	10	10	100	100
12	After	30	30	25	25	35	35	10	10	100	100
13	After	30	30	25	25	35	35	10	10	100	100
14	After	30	30	25	25	35	35	10	10	100	100
15	After	30	30	25	25	35	35	10	10	100	100
16	After
17	After	30	30	25	25	35	35	10	10	100	100
18	After	30	30	25	25	35	35	10	10	100	100
19	After	30	30	20	20	35	35	10	10	95	95
20	After	25	25	15	15	30	30	10	10	80	80
21	After	30	30	25	25	35	35	10	10	100	100
22	After	30	30	20	20	25	25	10	10	85	85
23	After	25	25	15	15	25	25	10	10	75	75
24	After	25	25	20	20	30	30	10	10	85	85
25	After	30	30	20	20	35	30	10	10	95	90
26	After	30	30	25	25	35	35	10	10	100	100
27	After	30	30	10	10	25	25	10	10	75	75
28	After	30	30	25	25	35	35	10	10	100	100
29	After	30	30	25	25	35	35	10	10	100	100
30	After	30	30	25	25	30	30	10	10	95	95
31	After	30	30	25	25	35	35	10	10	100	100
32	After	30	30	25	25	35	35	10	10	100	100
33	After	30	30	25	25	35	35	10	10	100	100
34	After	30	30	20	20	30	30	10	10	90	90
35	After	30	30	25	25	30	30	10	10	95	95
36	After	30	30	25	25	35	35	10	10	100	100
37	After	30	30	25	25	35	35	10	10	100	100
38	After	30	30	20	20	30	30	10	10	90	90
39	After	30	30	25	25	35	35	10	10	100	100
40	After	25	25	25	25	30	30	10	10	90	90
41	After	30	30	20	20	30	30	10	10	90	90
42	After	25	25	25	25	25	30	10	10	85	90
43	After	30	30	20	20	35	35	10	10	95	95
44	After	30	30	25	25	30	35	10	10	95	100
45	After	30	30	20	20	35	35	10	10	95	95
46	After	30	30	25	25	30	30	10	10	95	95
47	After	30	30	25	25	35	30	10	10	100	95

## Sheet: Blood_Urine
No	Checked	Urine specific gravity	Urine pH	White blood cell	Red blood cell	Hemoglobin	Hematocrit	Platelet	MCV	MCH	MCHC	AST (GOT)	ALT (GPT)	γ-GT (γ-GTP)	MMP-3	Uric acid	Urea Nitrogen	Hyaluronic acid	Triglyceride (TG)	Arachidonic acid (AA)	Eicosapentaenoic acid (EPA)	Di-homo-γ-linoleic acid	Docosahexaenoic acid (DHA)	EPA/AA ratio	Total cholesterol (T-Cho)	HDL-cholesterol(HDL-Cho)	LDL-cholesterol (LDL-Cho)	C-reactive protein (CRP)
1	Before	1.006	7	4800	438	13.6	42.4	19.8	97	31.1	32.1	24	16	20	32.6	5.3	12.8	56	119	209	79	56	130	0.38	214	65	125	0.06
2	Before	1.011	6.5									15	12	15	48.2	5.3	10.5	31	75	177	16	36	73	0.09	183	51	112	0.01
3	Before	1.022	7.5	5000	415	13.8	42.5	26.3	102	33.3	32.5	16	15	30	56.6	6.2	17.6	47.5	143	192	43	27	125	0.22	206	61	110	0.03
4	Before	1.007	7.5	7100	475	14.4	45.8	33.6	96	30.3	31.4	15	12	20	60.4	5.1	9.2	15.2	103	155	48	34	100	0.31	183	48	116	0.05
5	Before	1.008	7.5	6300	440	13	42.4	23.6	96	29.5	30.7	22	13	33	31.6	3.7	12.4	11	109	205	61	43	154	0.29	175	70	84	0.02
6	Before	1.005	7	5400	423	13.1	43	17.4	102	31	30.5	13	13	19	61.6	5.4	12.6	28.4	202	199	44	51	163	0.22	183	70	81	0.05
7	Before	1.006	7.5	4000	422	12.8	40.6	26.8	96	30.3	31.5	21	19	16	35	4.5	16.8	43.1	109	252	46	53	153	0.18	227	76	128	0.01
8	Before	1.018	5.5	3500	387	12.4	37.7	31	97	32	32.9	20	25	27	40.4	4.3	16.3	31	138	188	362	19	218	1.92	194	52	117	0.01
9	Before	1.016	7.5	6100	414	12.7	40.8	22.1	99	30.7	31.1	22	23	14	43.3	4.3	19.1	37.8	132	180	137	41	186	0.76	197	47	120	0.04
10	Before	1.006	7	5200	466	14	43.5	27.8	93	30	32.2	31	29	30	39.6	5.4	16	38.5	164	288	57	76	160	0.2	177	55	95	0.02
11	Before	1.018	5.5	7600	479	13.6	43.3	35.4	90	28.4	31.4	26	31	28	34.2	5.5	15.7	51.7	798	322	415	81	284	1.29	274	45	115	0.12
12	Before	1.009	7.5	6000	458	13.5	41.1	33.7	90	29.5	32.8	21	26	22	42.8	4.4	13.2	66.1	162	189	81	61	157	0.43	159	61	70	0.09
13	Before	1.022	6	6400	439	13	40.2	23.4	92	29.6	32.3	17	17	36	41.2	4.9	16.3	< 10.0	196	207	73	72	146	0.35	202	55	117	0.22
14	Before	1.023	6	3400	424	13.3	40	18.4	94	31.4	33.3	20	22	92	32.9	5.2	16.2	46.4	277	259	112	50	200	0.43	232	58	138	0.04
15	Before	1.017	7	9100	486	14.9	45.9	22.5	94	30.7	32.5	31	41	34	66	4.7	13.8	24.8	149	197	84	38	133	0.43	208	60	115	0.64
16	Before	1.009	8	5900	463	12.9	42.3	33	91	27.9	30.5	25	21	16	37.1	5.1	13.3	164	128	183	90	22	158	0.49	236	63	146	0.03
17	Before	1.018	7.5	6800	437	13.4	41.8	27.3	96	30.7	32.1	17	15	35	33.3	3.8	16.2	22.8	251	248	53	70	170	0.21	210	44	121	0.1
18	Before	1.022	5.5	7400	438	14	42	20.4	96	32	33.3	21	13	34	39.9	4.5	13	47.4	102	133	105	24	203	0.79	188	72	99	0.03
19	Before	1.007	7.5	6900	466	14.6	45.7	21.7	98	31.3	31.9	15	10	14	76.3	3.1	9.7	29.1	75	256	83	37	151	0.32	246	73	145	0.01
20	Before	1.02	6	5600	361	11.7	36.5	12.6	101	32.4	32.1	36	21	36	130.9	6.7	33.8	139	65	130	128	37	184	0.98	193	55	121	0.02
21	Before	1.009	7.5	4000	472	14.4	44	15.8	93	30.5	32.7	16	12	14	25.2	3.4	15.2	17.3	121	329	162	66	199	0.49	340	76	234	0.01
22	Before	1.013	7.5	9700	521	14.6	46.6	38.4	89	28	31.3	17	14	17	34.7	6	15.9	37	278	229	78	107	250	0.34	263	44	164	0.19
23	Before	1.025	5.5	5000	401	12.4	39.7	20.9	99	30.9	31.2	27	14	17	64.9	3.7	30.2	190	170	210	126	77	210	0.6	187	57	95	0.57
24	Before	1.003	6	7400	439	13.4	43	26.5	98	30.5	31.2	17	14	15	27.5	4.3	9.8	67.7	97	174	65	39	145	0.37	211	53	133	1.69
25	Before	1.022	5.5	4700	429	13.2	40.9	19.1	95	30.8	32.3	31	21	37	38.9	4.2	22.6	106	115	191	124	58	196	0.65	246	82	139	0.05
26	Before	1.016	8	6600	462	13.9	43	16.8	93	30.1	32.3	17	14	65	71.7	3.2	19.8	68.2	99	156	49	46	131	0.31	132	60	52	0.05
27	Before	1.013	5.5	7700	482	13.5	43.9	27.4	91	28	30.8	17	12	21	33.4	6.6	13.9	41.5	138	200	64	49	167	0.32	173	41	105	0.07
28	Before	1.009	6.5	7500	488	14	44.4	25	91	28.7	31.5	23	19	19	29.1	3.9	14.8	39.6	103	205	54	47	129	0.26	197	74	104	0.01
29	Before	1.028	7	8400	460	15.5	46	25.8	100	33.7	33.7	21	17	48	97	5.9	13.8	39.5	163	300	88	52	158	0.29	287	44	211	0.02
30	Before	1.015	6.5	6600	509	15.3	45.4	37.5	89	30.1	33.7	25	31	53	36.5	5.7	16.6	43.6	127	208	77	57	159	0.37	186	71	92	0.13
31	Before	1.01	7.5	5100	422	13	41.5	25.6	98	30.8	31.3	36	31	17	24.4	5.2	22.5	38.7	57	225	71	39	109	0.32	160	74	74	0.01
32	Before	1.022	6	8900	402	12.9	38.3	22.2	95	32.1	33.7	17	9	17	57.9	4.9	13.6	16.3	85	303	173	39	246	0.57	232	79	131	0.12
33	Before	1.021	7.5	4100	411	12.4	39.7	23.2	97	30.2	31.2	12	6	10	32.3	3.5	9.3	58.7	42	165	110	28	160	0.67	209	94	106	0.01
34	Before	1.013	7.5	7400	416	12.3	39.4	28	95	29.6	31.2	26	22	20	37.4	6.6	20.6	43.7	146	263	140	65	229	0.53	187	52	97	0.04
35	Before	1.006	6.5	5200	461	14.4	44.7	22.9	97	31.2	32.2	27	23	26	38.8	4.9	14.7	< 10.0	107	216	9.8	41	71	0.05	177	78	75	0.07
36	Before	1.015	6.5	7000	478	13.2	42	21.9	88	27.6	31.4	20	16	33	35.3	4.6	14.9	44.4	220	328	210	67	224	0.64	233	72	124	0.01
37	Before	1.016	7.5	4100	412	12.4	39.4	25.8	96	30.1	31.5	19	13	15	65.2	3	15.9	33.9	109	132	41	27	135	0.31	199	60	115	0.01
38	Before	1.014	7	5300	443	14.3	44.8	22.5	101	32.3	31.9	26	18	13	56.4	5.6	18.8	64.6	116	211	186	35	233	0.88	241	74	141	0.03
39	Before	1.016	5.5	6200	429	13.4	42	26.1	98	31.2	31.9	23	19	31	29.7	3.5	15.5	13.4	230	260	93	80	173	0.36	233	69	120	0.05
40	Before	1.019	5.5	6200	460	13.2	40.5	24.4	88	28.7	32.6	28	28	21	44.5	4.6	20.2	50	482	309	97	129	132	0.31	222	56	98	0.03
41	Before	1.011	6	5300	403	12.7	38.2	22.7	95	31.5	33.2	26	17	18	31.1	5.1	16	58.1	148	163	103	52	178	0.63	196	55	107	0.02
42	Before	1.014	5.5	5000	457	13.8	41.9	26.3	92	30.2	32.9	19	13	15	51	5.2	15.2	64.3	157	306	122	52	207	0.4	214	57	126	0.18
43	Before	1.002	7	7300	392	12.3	40.5	30.1	103	31.4	30.4	22	21	19	50.1	4.9	10.1	98.2	66	235	47	96	97	0.2	235	71	142	0.12
44	Before	1.018	6.5	4900	503	15.3	48.1	17.1	96	30.4	31.8	22	24	24	56.1	2.5	12.2	48.8	190	191	52	40	194	0.27	191	53	91	0.03
45	Before	1.009	7.5	5100	452	13	41.1	27.2	91	28.8	31.6	22	14	19	42.1	4.4	19.1	35	132	176	69	35	125	0.39	212	52	134	0.2
46	Before	1.011	7.5	7700	473	14.7	45.1	21.6	95	31.1	32.6	18	12	22	70.1	4.8	19.6	48.5	79	193	124	45	143	0.64	233	86	125	0.14
47	Before	1.012	7	6200	476	15	46.3	24.8	97	31.5	32.4	18	12	13	62.8	5	13.8	18.7	93	214	55	45	147	0.26	211	79	117	0.02
1	After	1.008	7.5	5300	449	13.8	43.5	19.5	97	30.7	31.7	17	11	21	36.8	6	15.7	113	169	231	48	82	125	0.21	206	67	110	0.07
2	After	1.014	7.5	5200	446	13.8	44	25.9	99	30.9	31.4	16	12	17	49.7	4.7	10.4	72.1	128	188	24	50	89	0.13	192	50	111	0.01
3	After	1.017	6.5	4900	423	13.9	42.8	25.4	101	32.9	32.5	18	14	42	50.7	5.5	14.6	180	118	202	100	23	139	0.49	216	63	127	0.25
4	After	1.009	7	7200	482	14.6	45.8	34.1	95	30.3	31.9	13	11	19	47.9	4.7	12.2	15	81	154	77	24	96	0.5	176	53	105	0.1
5	After	1.008	7.5	5800	437	12.9	41.4	25.4	95	29.5	31.2	23	13	30	30.1	3.5	10	19.3	66	224	39	39	124	0.17	181	80	87	0.01
6	After	1.006	7	6200	409	12.8	40.6	17.4	99	31.3	31.5	14	11	18	54.2	5.6	13.6	27.1	95	191	64	46	178	0.34	194	82	93	0.53
7	After	1.007	7.5	4000	407	12.3	39.2	28.1	96	30.2	31.4	22	16	16	38.2	5	16.5	27	97	211	153	30	175	0.72	206	72	117	0.01
8	After	1.017	5.5	5300	406	12.5	38.8	32.5	96	30.8	32.2	25	27	41	26	4.8	19.1	54.4	277	243	365	39	316	1.5	214	47	122	0.03
9	After	1.006	8	4800	414	13	40.9	20.7	99	31.4	31.8	24	23	16	51	3.4	12	111	144	165	106	38	167	0.64	179	49	107	0.02
10	After	1.015	7	5200	477	14.3	45.3	27.1	95	30	31.6	28	27	30	41	4.3	16.4	23.6	281	266	77	94	188	0.29	204	48	101	0.03
11	After	1.023	7	6600	472	13.4	43	34.2	91	28.4	31.2	23	30	29	33.2	6.7	22.1	42.6	430	287	248	73	204	0.86	241	49	109	0.11
12	After	1.013	6.5	5800	455	13.2	40.9	32.2	90	29	32.3	22	30	27	43.2	4.2	14.8	64.9	208	223	65	85	194	0.29	221	64	129	0.1
13	After	1.018	6	4500	449	13	40.3	22.4	90	29	32.3	17	14	24	40.3	4.2	8.7	21.6	102	184	35	46	102	0.19	199	49	128	0.35
14	After	1.009	6	3500	440	13.8	41.9	18.7	95	31.4	32.9	23	27	96	35.1	4.8	12.4	44.1	159	292	109	61	218	0.37	252	64	164	0.04
15	After	1.014	6.5	9800	489	14.8	47.2	19.5	97	30.3	31.4	36	50	38	45.8	4.9	12.3	40.7	119	182	203	43	145	1.12	224	67	128	0.25
16	After	1.003	6.5	8300	463	12.8	40.1	30.3	87	27.6	31.9	23	14	15	30.1	4.6	9.4	39.9	73	201	71	45	201	0.35	273	75	178	2.21
17	After	1.032	6	6400	432	13.3	42.4	27.4	98	30.8	31.4	19	17	29	37.8	4.1	17.2	46.8	179	209	75	58	167	0.36	208	43	126	0.07
18	After	1.016	5.5	6800	427	13.6	41.9	19	98	31.9	32.5	24	15	36	44.3	5.2	13.7	46	84	130	136	23	186	1.04	187	67	100	0.04
19	After	1.004	7	6600	471	14.7	45.8	24.1	97	31.2	32.1	14	11	15	71.6	3.3	9.6	16.8	55	190	44	33	105	0.23	211	72	122	0.01
20	After	1.012	7	5600	372	11.9	38.5	13.3	103	32	30.9	33	22	36	111.2	6.9	27.8	193	100	142	253	35	294	1.78	206	50	129	0.06
21	After	1.011	7.5	4900	469	14	44.7	17.6	95	29.9	31.3	14	9	15	43.2	3.4	14.8	15.3	120	221	132	50	140	0.6	275	61	188	0.03
22	After	1.013	5.5	7800	500	14	45.6	36.1	91	28	30.7	16	13	15	45.6	5.1	20.7	93.4	178	219	61	86	163	0.28	269	55	182	0.08
23	After	1.026	5.5	3700	403	12.1	39.7	20.7	99	30	30.5	23	13	20	57.9	3	21.8	209	108	187	119	68	164	0.63	221	58	139	0.19
24	After	1.006	5.5	5200	425	12.9	41.7	25.2	98	30.4	30.9	19	17	13	38.6	4.2	14	89	82	179	147	27	197	0.82	193	53	121	0.03
25	After	1.014	6	5000	434	13.4	41.2	19.1	95	30.9	32.5	29	22	41	41.5	4.5	23.7	107	58	204	113	49	188	0.55	265	99	147	0.12
26	After	1.023	6	6700	490	14.4	45.7	18	93	29.4	31.5	22	21	81	40.5	5	21.5	73.9	56	173	43	32	128	0.25	137	67	59	0.02
27	After	1.007	5.5	7100	481	13.6	44.5	26.6	93	28.3	30.6	19	13	19	38.6	5.8	12.2	41.4	111	195	128	29	177	0.66	163	44	90	0.02
28	After	1.005	7.5	7600	481	13.7	44.6	24.1	93	28.5	30.7	20	16	19	36.7	5.1	16.2	85.4	115	245	28	65	114	0.11	201	69	108	0.01
29	After	1.018	7	7300	489	16.1	48.2	25	99	32.9	33.4	24	19	55	54	7	12.5	10.5	216	274	167	46	226	0.61	255	45	163	0.14
30	After	1.031	5.5	6000	528	15.7	51.6	34.6	98	29.7	30.4	22	24	51	37.7	6	21.9	37.1	101	204	149	51	194	0.73	204	74	102	0.22
31	After	1.018	6.5	5000	404	12.3	42.2	24.4	104	30.4	29.1	19	18	15	30.9	5.8	26	43.9	56	232	104	40	133	0.45	172	81	79	0.01
32	After	1.025	6	7900	395	12.5	38.4	21.6	97	31.6	32.6	15	10	17	50.1	4.6	14.4	19.2	120	263	137	51	221	0.52	232	75	132	0.05
33	After	1.03	5.5	4200	435	12.7	40.3	23.8	93	29.2	31.5	13	6	12	40	4.9	13	81.5	54	206	98	28	155	0.48	212	87	115	0.01
34	After	1.016	6.5	6000	401	11.9	38.3	27.7	96	29.7	31.1	25	20	19	36.4	6.3	20.4	104	78	221	91	59	159	0.41	203	61	118	0.04
35	After	1.018	7	5700	449	13.7	42.2	25.1	94	30.5	32.5	20	16	23	38.5	5.1	14.3	12.5	103	210	11	35	55	0.05	182	87	83	0.01
36	After	1.015	7	6500	464	12.8	39.4	21.3	85	27.6	32.5	17	12	28	36.3	4.9	14.7	64.2	88	248	102	49	149	0.41	225	81	122	0.01
37	After	1.015	7	3500	410	12.9	39.5	26	96	31.5	32.7	20	11	13	80.7	3	10.5	68	63	143	32	26	134	0.22	209	65	128	0.01
38	After	1.012	7.5	5200	436	14.6	44.4	20.9	102	33.5	32.9	24	15	13	57.7	6.4	15.4	87.9	85	169	80	29	154	0.47	230	79	135	0.07
39	After	1.026	6	4600	413	12.6	41	22.8	99	30.5	30.7	22	21	27	23.6	3.6	17.3	23.2	112	231	71	70	144	0.31	210	71	116	0.06
40	After	1.014	7	4200	439	12.7	40	22.8	91	28.9	31.8	20	19	19	41.1	4.6	17	58.9	203	207	44	67	105	0.21	185	70	86	0.02
41	After	1.011	7.5	6600	399	12.5	38.2	25.8	96	31.3	32.7	26	16	18	34.1	5.7	16.2	217	92	169	131	45	228	0.77	200	58	121	0.21
42	After	1.024	7.5	4600	467	13.8	44.4	25.5	95	29.6	31.1	17	12	15	49.2	4.9	18.1	76.6	97	243	82	47	145	0.34	196	57	116	0.09
43	After	1.005	7	5800	383	11.6	36	28.9	94	30.3	32.2	24	20	17	40.9	4.3	11.9	66	150	210	65	83	117	0.31	226	62	130	0.05
44	After	1.018	6	4900	485	14.6	43.4	18.6	89	30.1	33.6	22	27	25	45.7	2.7	12.1	58.5	137	161	101	27	178	0.63	187	56	96	0.03
45	After	1.008	7	5100	457	12.9	40.5	27.3	89	28.2	31.9	24	13	18	41.5	4.3	19.5	29.1	167	200	124	36	157	0.62	237	52	154	0.2
46	After	1.01	6	6100	486	14.8	46	20.9	95	30.5	32.2	19	13	28	65.3	4.3	17.2	124	84	197	100	49	135	0.51	243	86	137	0.05
47	After	1.002	6.5	4700	453	14.5	45.5	23.3	100	32	31.9	23	20	14	72.3	4.5	14.1	53.2	62	181	111	32	127	0.61	201	88	99	0.01
